# Supplementary material for: Protein crystal structures with ferrocene and ruthenocene-based enzyme inhibitors
Source: Royal Society of Chemistry journal article supplement (doi:10.1039/c2cc15625c), 2012-01-01
Supplement: c2cc15625c.pdf [file c2cc15625c.pdf]

## Electronic Supplementary Information

### Protein crystal structures with ferrocene and ruthenocene-based enzyme inhibitors

Adam J. Salmon, Michael L. Williams, Andreas Hofmann and Sally-Ann Poulsen<sup>\*</sup>

<sup>\*</sup>Corresponding author e-mail: [s.poulsen@griffith.edu.au](mailto:s.poulsen@griffith.edu.au)

#### Materials and Methods

##### Production of recombinant human carbonic anhydrase (CA) II

Human recombinant CA II was expressed in *Escherichia coli* BL21(DE3) using the plasmid pACA-I (kindly provided by Prof Carol Fierke) and an in-house implementation of the auto-induction method<sup>1</sup>. After cell lysis, soluble protein was purified by anion exchange chromatography with Q-Sepharose resin. Protein quality was checked by SDS-PAGE throughout.

##### Crystallisation

The concentrated protein (18 mg mL<sup>-1</sup>) was subjected to co-crystallisation with ligands by the hanging drop vapour diffusion method, using a selection of ammonium sulfate containing conditions from our in-house factorial collection (2.6 or 2.9 M (NH<sub>4</sub>)<sub>2</sub>SO<sub>4</sub>, and 0.1 M MES pH 6.5 or 0.1 M glycine pH 9.5). Crystallisation droplets consisted of 3 µL protein, 2 µL reservoir and 1 µL ligand solution (60 mM in MeOH). Monoclinic crystals appeared after 1-2 weeks.

##### Protein X-ray crystallography

X-ray diffraction data were obtained under cryo conditions at the Australian Synchrotron beam line MX1 equipped with a Quantum ADSC CCD detector. Data were processed with MOSFLM<sup>2</sup> and SCALA from the CCP4 suite<sup>3</sup>. Crystal structures were determined using the isomorphous structure of native human CA II. Ligand constraints for cyclopentadienyl-substituted triazole benzenesulfonamides were obtained by PRODRG and manually edited to obtain the full

metallocene containing ligand topologies, guided by parameters obtained from small molecule structures (ferrocene: Fe-C distances 2.05 Å, staggered conformation of Cp rings; ruthenocene: Ru-C distances 2.29 Å, eclipsed conformation of Cp rings). Computational refinement of the ligand-bound crystal structures was carried out with CNS<sup>4</sup> or REFMAC<sup>5</sup>, interspersed with visual inspection and manual model building with O<sup>6</sup> and Coot<sup>7</sup>. The geometry of refined structures was evaluated with PROCHECK<sup>8</sup>.

**Table S1: Data collection and refinement statistics**

| Crystal                                                    | CA II:1                       | CA II:2                       | CA II:3                       | CA II:4                       |
|------------------------------------------------------------|-------------------------------|-------------------------------|-------------------------------|-------------------------------|
| <b>Data collection</b>                                     |                               |                               |                               |                               |
| X-ray source                                               | AS MX1                        | AS MX1                        | AS MX1                        | AS MX1                        |
| Space group                                                | P2 <sub>1</sub>               | P2 <sub>1</sub>               | P2 <sub>1</sub>               | P2 <sub>1</sub>               |
| Cell dimensions: <i>a</i> , <i>b</i> , <i>c</i> (Å); β (°) | 42.4, 41.6, 72.2; 104.6       | 42.5, 41.6, 72.2; 104.8       | 42.5, 41.6, 72.3; 104.6       | 42.5, 41.6, 72.5; 104.9       |
| Wavelength (Å)                                             | 1.509                         | 0.9568                        | 1.509                         | 0.9568                        |
| Resolution (Å)                                             | 2.0                           | 1.5                           | 2.2                           | 1.6                           |
| <i>R</i> <sub>sym</sub>                                    | 0.078 (0.157)                 | 0.059 (0.174)                 | 0.077 (0.258)                 | 0.069 (0.256)                 |
| Completeness                                               | 0.946 (0.924)                 | 0.996 (0.985)                 | 0.988 (0.954)                 | 0.991 (0.943)                 |
| Redundancy                                                 | 3.8 (3.8)                     | 4.0 (3.9)                     | 3.5 (3.3)                     | 7.1 (5.7)                     |
| <b>Refinement</b>                                          |                               |                               |                               |                               |
| Resolution (Å)                                             | 2.0                           | 1.5                           | 2.2                           | 1.6                           |
| No. reflections: work / test                               | 15173 / 780                   | 37150 / 1969                  | 11774 / 630                   | 28932 / 1596                  |
| <i>R</i> <sub>work</sub> / <i>R</i> <sub>free</sub>        | 0.187 (0.217) / 0.223 (0.235) | 0.176 (0.192) / 0.201 (0.220) | 0.186 (0.204) / 0.241 (0.275) | 0.193 (0.214) / 0.203 (0.223) |
| No. atoms                                                  |                               |                               |                               |                               |
| Protein                                                    | 2049                          | 2059                          | 2049                          | 2049                          |
| Ion                                                        | 1 (Zn <sup>2+</sup> )         |
| Ligand                                                     | 26 (1), 12 (2x glycerol)      | 26 (2), 6 (glycerol)          | 26 (3), 12 (2x glycerol)      | 26 (4), 6 (glycerol)          |
| Water                                                      | 172                           | 369                           | 122                           | 191                           |
| Average B-factors                                          |                               |                               |                               |                               |
| Protein (Å <sup>2</sup> )                                  | 16.3                          | 5.57                          | 23.8                          | 15.0                          |
| Ion (Å <sup>2</sup> )                                      | 11.1                          | 2.00                          | 15.0                          | 8.27                          |
| Ligand (Å <sup>2</sup> )                                   | 22.0 (1), 25.7 (glycerol)     | 12.7 (2), 10.3 (glycerol)     | 45.5 (3), 32.5 (glycerol)     | 24.4 (4), 23.3 (glycerol)     |
| Water (Å <sup>2</sup> )                                    | 29.1                          | 19.3                          | 33.9                          | 25.5                          |
| R.m.s deviations                                           |                               |                               |                               |                               |
| bond lengths (Å)                                           | 0.005                         | 0.011                         | 0.005                         | 0.005                         |
| bond angles (°)                                            | 1.403                         | 1.251                         | 1.410                         | 1.420                         |
| B-factor for bonded protein atoms                          | 2.72                          | 1.23                          | 3.11                          | 2.35                          |
| B-factor for bonded ligand atoms                           | 2.11 (1), 3.24 (glycerol)     | 2.54 (2), 2.42 (glycerol)     | 4.56 (3), 4.93 (glycerol)     | 2.61 (4), 3.35 (glycerol)     |
| Ramachandran plot <sup>a</sup>                             | 0.870, 0.120, 0.009, 0.0      | 0.889, 0.106, 0.005, 0.0      | 0.880, 0.111, 0.009, 0.0      | 0.894, 0.106, 0.0, 0.0        |

Datasets were obtained from one crystal each. Values in parentheses are for highest-resolution shell. Coordinates and structure factors have been deposited with the PDB accession codes: 3P55 (CA II:1), 3P3H (CA II:2), 3P44 (CA II:3) and 3P3J (CA II:4).

<sup>a</sup>Residues in most favoured regions, additional allowed regions, generously allowed regions, disallowed regions.

## References

1. Studier, F., Protein production by auto-induction in high density shaking cultures. *Protein Expr. Purif.* 2005, *41*, 207-234.
2. Leslie, A., Recent changes to the MOSFLM package for processing film and image plate data. Joint CCP4 + ESF-EAMCB. *Newsletter on Protein Crystallography* 1992, *26*.
3. Collaborative Computational Project Number 4. The CCP4 suite: programs for protein crystallography. *Acta Crystallogr. D* 1994, *50*, 760-763.
4. Brünger, A.; Adams, P.; Clore, G.; Delano, W.; Gros, P.; Grosse-Kunstleve, R.; Jiang, J.; Kuszewski, J.; Nilges, N.; Pannu, N.; Read, R.; Rice, L.; Simonson, T.; Warren, G., Crystallography and NMR system (CNS): A new software system for macromolecular structure determination. *Acta Crystallogr. D* 1998, *54*, 905-921.
5. Murshudov, G. N.; Vagin, A. A.; Dodson, E. J., Refinement of Macromolecular Structures by the Maximum-Likelihood Method. *Acta Crystallogr.* 1997, *D 53*, 240-255.
6. Jones, T. A.; Zou, J. Y.; Cowan, S.; Kjeldgaard, M., Improved methods for building protein models in electron density maps and location of errors in these models. *Acta Crystallogr. A* 1991, *47*, 110-119.
7. Emsley, P.; Cowton, K., Coot: Model-Building Tools for Molecular Graphics. *Acta Crystallogr., Sect. D: Biol. Crystallogr.* 2004, *60*, 2126-2132.
8. Laskowski, R.; MacArthur, M.; Moss, D.; Thornton, J., PROCHECK: A program to check the stereochemical quality of protein structures. *J. Appl. Cryst.* 1993, *26*, 283-291.
